# Supplementary material for: Lemur Biorhythms and Life History Evolution
Source: PubMed Central journal article supplement (PMC4534448; doi:10.1371/journal.pone.0134210), 2015-08-12

**Figure S1. Phylogeny used in PGLS analyses.** Includes all extant primates in the study and subfossil lemurs. See the main paper for details & references. To incorporate subfossil lemurs, branch lengths are calibrated as a chronogram. Anthropoid/strepsirrhine divergence date calibrated following Kistler et al. [40]

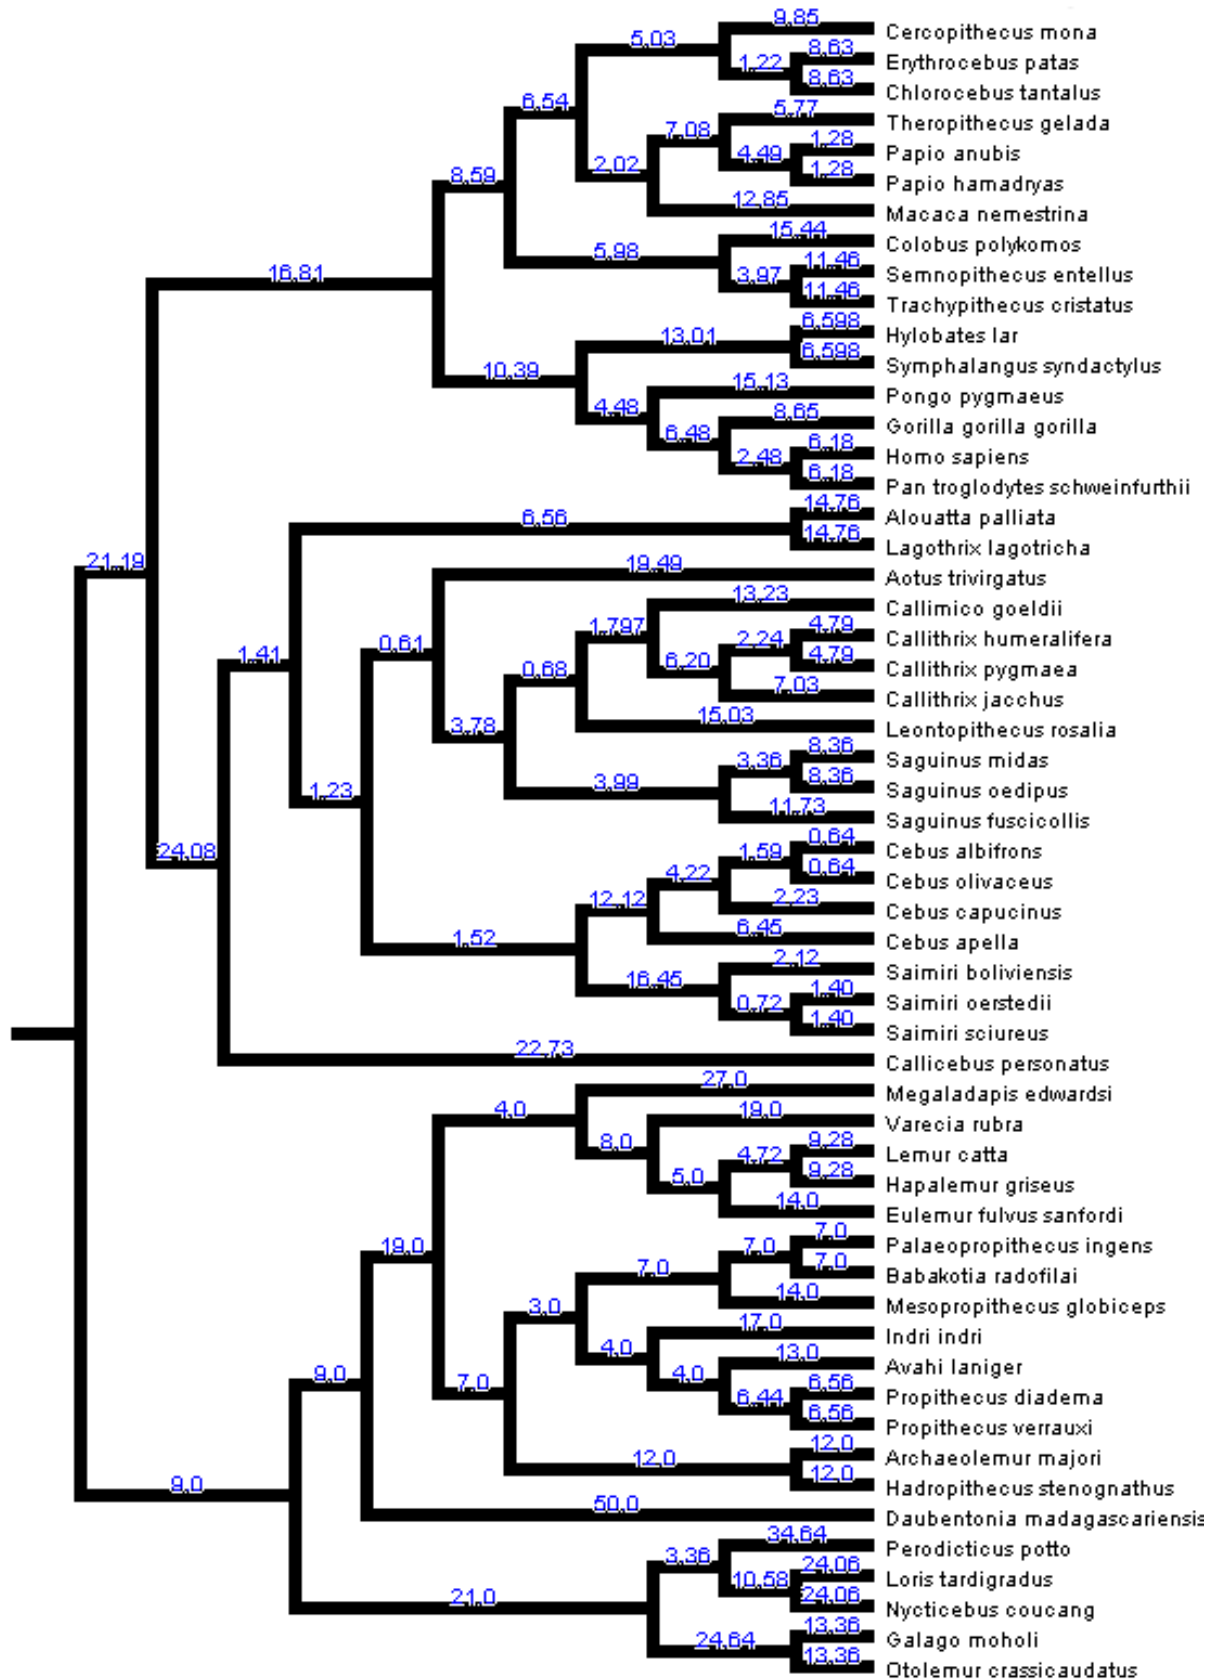

Supplement: pone.0134210.s001.pdf [file pone.0134210.s001.pdf]
