# Supplementary material for: Lemur Biorhythms and Life History Evolution
Source: PubMed Central journal article supplement (PMC4534448; doi:10.1371/journal.pone.0134210), 2015-08-12
Supplement: pone.0134210.s002.pdf [file pone.0134210.s002.pdf]

**Table S1. Specimens and sources.** All specimens which were used to generate new data (i.e., not taken from the literature) are listed here. Sources are listed as follows: UMass = University of Massachusetts uncatalogued, Jonah Ratsimbazafy Collection, Manombo Reserve; DLC = Duke Lemur Center; GDBP = Great Divide Basin Project; UM-APC = University of Massachusetts Anthropological Primate and Natural History Collections; ASU = Arizona State University; Newcastle = Newcastle University School of Dental Sciences; M = Montpellier II University; UZI = Universität Zürich-Irchel.

| Taxon                               | Source       | Specimen number         | Specimen type |
|-------------------------------------|--------------|-------------------------|---------------|
| <b>strepsirrhines</b>               |              |                         |               |
| <i>Avahi laniger</i>                | UMass        | N/A                     | femur         |
| <i>Babakotia radofilai</i>          | DLC          | 11832                   | tooth         |
| <i>Cantius abditus</i>              | GDBP         | WMU-VP 359              | tooth         |
| <i>Cantius abditus</i>              | GDBP         | WMU-VP 654826           | tooth         |
| <i>Cantius abditus</i>              | GDBP         | WMU-VP 6541103          | tooth         |
| <i>Cantius abditus</i>              | GDBP         | WMU-VP 4587             | tooth         |
| <i>Cantius abditus</i>              | GDBP         | WMU-VP 371              | tooth         |
| <i>Cantius abditus</i>              | GDBP         | WMU-VP 363              | tooth         |
| <i>Cantius abditus</i>              | GDBP         | WMU-VP g501589          | tooth         |
| <i>Daubentonia madagascariensis</i> | DLC          | “Poe”                   | tooth         |
| <i>Daubentonia madagascariensis</i> | DLC          | 6514m                   | tooth, femur  |
| <i>Eulemur fulvus sanfordi</i>      | DLC          | 4564m                   | tooth, femur  |
| <i>Galago moholi</i>                | DLC & UM-APC | DLC 2018f<br>UM-APC 207 | tooth, femur  |
| <i>Haplemur griseus</i>             | DLC          | 1317f                   | tooth, femur  |
| <i>Indri indri</i>                  | ASU          | S26                     | tooth         |
| <i>Lemur catta</i>                  | DLC & UM-APC | DLC 6530f<br>UM-APC 9   | tooth         |
| <i>Lemur catta</i>                  | DLC & UM-APC | DLC 6158f<br>UM-APC 253 | tooth         |
| <i>Lemur catta</i>                  | Newcastle    | HT13-90                 | tooth         |
| <i>Leptadapis magnus</i>            | M            | ACQ 6415                | tooth         |
| <i>Loris tardigradus</i>            | DLC          | 2930m                   | tooth, femur  |
| <i>Nycticebus coucang</i>           | DLC & UM-APC | DLC 1949m<br>UM-APC 170 | tooth, femur  |
| <i>Otolemur crassicaudatus</i>      | Newcastle    | HT12-90                 | tooth         |

|                                 |                     |          |              |
|---------------------------------|---------------------|----------|--------------|
| <i>Otolemur crassicaudatus</i>  | Newcastle           | HT 17-00 | tooth        |
| <i>Perodicticus potto</i>       | UM-APC              | 163      | tooth, femur |
| <i>Propithecus coquereli</i>    | DLC                 | 6845m    | tooth, femur |
| <i>Propithecus diadema</i>      | Newcastle           | HT16-90  | tooth        |
| <i>Varecia variegata rubra</i>  | DLC                 | 5628f    | tooth, femur |
| <i>Varecia variegata</i>        | Newcastle           | HT25-08  | tooth        |
| <b>anthropoids</b>              |                     |          |              |
| <i>Cercopithecus mona</i>       | Newcastle           | HT01-10  | tooth        |
| <i>Chlorocebus tantalus</i>     | Newcastle           | HT06-02  | tooth        |
| <i>Chlorocebus tantalus</i>     | Newcastle           | HT07-02  | tooth        |
| <i>Colobos polykomos</i>        | UZI                 | Co.p 3   | tooth        |
| <i>Lagothrix poeppigii</i>      | University of Texas | N/A      | tooth        |
| <i>Lagothrix poeppigii</i>      | University of Texas | N/A      | tooth        |
| <i>Trachypithecus cristatus</i> | Newcastle           | HT19-05  | tooth        |
