# Supplementary material for: Lemur Biorhythms and Life History Evolution
Source: PubMed Central journal article supplement (PMC4534448; doi:10.1371/journal.pone.0134210), 2015-08-12
Supplement: pone.0134210.s003.pdf [file pone.0134210.s003.pdf]

**Table S2. Raw data table for our study.** Preference was given to modal values for Retzius periodicity (RP) data whenever possible, since RP is expressed in multiples of 1 day; whenever data were available for only two or three specimens, mean values were used. However, the majority of species samples consist only of a single individual. For species with high sexual dimorphism, values for both males and females were included separately where available. RP and osteocyte data lacking a citation are newly published values generated by our study. References given in main paper; wherever possible, RP, mass, and ECV data drawn from the compilation in Bromage *et al.* [2] and Isler *et al.* [26]. All SCR data from Spoor *et al.* [30].

† =Extinct species

\* = Modal value reported from literature

\*\* = Data are presented for more than one individual for these species, but too few individuals have been sampled to incorporate a reliable mode value. For these species, statistical analyses incorporate means of the reported values.

| <i>genus &amp; species</i>          | <i>RP, days<br/>(ln)<br/>[ref]</i> | <i>osteocyte<br/>density,<br/>per mm<sup>2</sup><br/>(ln)</i> | <i>body mass,<br/>kg<br/>(ln)<br/>[ref]</i> | <i>endocranial<br/>volume, cc<br/>(ln)<br/>[ref]</i> | <i>semicircular<br/>canal radius,<br/>mm<br/>(ln)</i> | <i>basal<br/>metabolic<br/>rate, mL O<sub>2</sub>/h<br/>(ln)<br/>[ref]</i> | <i>1<sup>st</sup> female<br/>reproduction,<br/>years<br/>(ln)<br/>[ref]</i> |
|-------------------------------------|------------------------------------|---------------------------------------------------------------|---------------------------------------------|------------------------------------------------------|-------------------------------------------------------|----------------------------------------------------------------------------|-----------------------------------------------------------------------------|
| <b><i>strepsirrhines</i></b>        |                                    |                                                               |                                             |                                                      |                                                       |                                                                            |                                                                             |
| <i>Archaeolemur major</i> †         | 4<br>(1.386)<br>[24]               | --                                                            | 18.2<br>(2.901)<br>[27]                     | 93<br>(4.533)<br>[27]                                | 3<br>(1.090)                                          | --                                                                         |                                                                             |
| <i>Avahi laniger</i>                | 2<br>(0.693)                       | 632<br>(6.449)                                                | 1.32<br>0.278<br>[26]                       | 9.86<br>(2.288)<br>[26]                              | 1.9<br>(0.642)                                        | --                                                                         | 2.58<br>(0.948)<br>[1]                                                      |
| <i>Babakotia radofila</i> †         | 2<br>(0.693)                       | --                                                            | 20.7<br>(3.03)<br>[27]                      | 48<br>(3.871)<br>[27]                                | 2.4<br>(0.875)                                        | --                                                                         |                                                                             |
| <i>Cantius abditus</i> †            | 3**<br>(1.099)                     | --                                                            | 3<br>(1.099)<br>[22]                        | --                                                   | --                                                    | --                                                                         |                                                                             |
| <i>Daubentonia madagascariensis</i> | 3,4**<br>(1.253)                   | 549<br>(6.308)                                                | 2.59<br>(0.952)<br>[26]                     | 44.85<br>(3.803)<br>[26]                             | 2.4<br>(0.875)                                        | 1393.9<br>(7.240)<br>[18]                                                  | 3.5<br>(1.253)<br>[38]                                                      |

| <b>genus &amp; species</b>              | <b>RP, days<br/>(ln)<br/>[ref]</b> | <b>osteocyte<br/>density,<br/>per mm<sup>2</sup><br/>(ln)</b> | <b>body mass,<br/>kg<br/>(ln)<br/>[ref]</b> | <b>endocranial<br/>volume, cc<br/>(ln)<br/>[ref]</b> | <b>semicircular<br/>canal radius,<br/>mm<br/>(ln)</b> | <b>basal<br/>metabolic<br/>rate, mL O<sub>2</sub>/h<br/>(ln)<br/>[ref]</b> | <b>1<sup>st</sup> female<br/>reproduction,<br/>years<br/>(ln)<br/>[ref]</b> |
|-----------------------------------------|------------------------------------|---------------------------------------------------------------|---------------------------------------------|------------------------------------------------------|-------------------------------------------------------|----------------------------------------------------------------------------|-----------------------------------------------------------------------------|
| <i>Eulemur sanfordi</i>                 | 3<br>(1.099)                       | 724<br>(6.595)                                                | 2.292<br>(0.829)<br>[26]                    | 25.77<br>(3.249)<br>[26]                             | 2.2<br>(0.788)                                        | 940<br>(6.846)<br>[18]                                                     | 2.66<br>(0.978)<br>[1]                                                      |
| <i>Galago moholi</i>                    | --                                 | 975<br>(6.882)                                                | 0.244<br>(-1.411)<br>[2]                    | 3.71<br>(1.311)<br>[26]                              | 1.5<br>(0.405)                                        | 198<br>(5.288)<br>[18]                                                     | 0.71<br>(-0.342)<br>[1]                                                     |
| <i>Hadropithecus<br/>stenognathus</i> † | 4<br>(1.386)<br>[24]               | --                                                            | 35.4<br>(3.567)<br>[27]                     | 115<br>(4.745)<br>[27]                               | 2.7<br>(0.993)                                        | --                                                                         | --                                                                          |
| <i>Hapalemur griseus</i>                | 2<br>(0.693)                       | 857<br>(6.753)                                                | 0.709<br>(-0.344)<br>[26]                   | 14.09<br>(2.645)<br>[26]                             | 2<br>(0.693)                                          | --                                                                         | 2.73<br>(1.004)<br>[1]                                                      |
| <i>Indri indri</i>                      | 2<br>(0.693)                       | --                                                            | 6.84<br>(1.923)<br>[26]                     | 34.81<br>(3.560)<br>[26]                             | 2.7<br>(0.993)                                        | --                                                                         | 8<br>(2.079)<br>[36]                                                        |
| <i>Lemur catta</i>                      | 2,3,3**<br>(0.981)                 | --                                                            | 2.21<br>(0.793)<br>[26]                     | 22.9<br>(3.131)<br>[26]                              | 2.1<br>(0.742)                                        | 651.4<br>(6.479)<br>[18]                                                   | 2.63<br>(0.967)<br>[1]                                                      |
| <i>Leptadapis<br/>magnus</i> †          | 3<br>(1.099)                       | --                                                            | 4<br>(1.386)<br>[22]                        | 21.7<br>(3.077)<br>[29]                              | --                                                    | --                                                                         | --                                                                          |
| <i>Loris tardigradus</i>                | 3<br>(1.099)                       | 476<br>(6.165)                                                | 0.193<br>(-1.645)<br>[26]                   | 5.87<br>(1.770)<br>[26]                              | 1.2<br>(0.182)                                        | 107.4<br>(4.677)<br>[18]                                                   | 1.5<br>(0.405)<br>[36]                                                      |
| <i>Megaladapis<br/>edwardsi</i> †       | 3<br>(1.099)<br>[13]               | --                                                            | 85.1<br>(4.444)<br>[27]                     | 137<br>(4.920)<br>[27]                               | 2.3<br>(0.833)                                        | --                                                                         | --                                                                          |

| <b>genus &amp; species</b>                    | <b>RP, days<br/>(ln)<br/>[ref]</b> | <b>osteocyte<br/>density,<br/>per mm<sup>2</sup><br/>(ln)</b> | <b>body mass,<br/>kg<br/>(ln)<br/>[ref]</b> | <b>endocranial<br/>volume, cc<br/>(ln)<br/>[ref]</b> | <b>semicircular<br/>canal radius,<br/>mm<br/>(ln)</b> | <b>basal<br/>metabolic<br/>rate, mL O<sub>2</sub>/h<br/>(ln)<br/>[ref]</b> | <b>1<sup>st</sup> female<br/>reproduction,<br/>years<br/>(ln)<br/>[ref]</b> |
|-----------------------------------------------|------------------------------------|---------------------------------------------------------------|---------------------------------------------|------------------------------------------------------|-------------------------------------------------------|----------------------------------------------------------------------------|-----------------------------------------------------------------------------|
| <i>Mesopropithecus globiceps</i> <sup>†</sup> | 3<br>(1.099)<br>[19]               | --                                                            | 11.3<br>(2.425)<br>[27]                     | 41<br>(3.714)<br>[27]                                | 2.3<br>(0.833)                                        | --                                                                         | --                                                                          |
| <i>Nycticebus coucang</i>                     | 2<br>(0.693)                       | 562<br>(6.332)                                                | 0.679<br>(-0.387)<br>[26]                   | 10.41<br>(2.343)<br>[26]                             | 1.5<br>(0.405)                                        | 273<br>(5.609)<br>[18]                                                     | --                                                                          |
| <i>Otolemur crassicaudatus</i>                | 2,3**<br>(0.916)                   | --                                                            | 1.15<br>(0.140)<br>[26]                     | 11.78<br>(2.466)<br>[26]                             | 2<br>(0.693)                                          | 523<br>(6.260)<br>[18]                                                     | 2.21<br>(0.793)<br>[36]                                                     |
| <i>Palaeopropithecus ingens</i> <sup>†</sup>  | 2<br>(0.693)<br>[12]               | --                                                            | 41.5<br>(3.726)<br>[27]                     | 80<br>(4.382)<br>[27]                                | 1.9<br>(0.642)                                        | --                                                                         | --                                                                          |
| <i>Perodicticus potto</i>                     | 2,3**<br>(0.916)                   | 558<br>(6.324)                                                | 0.835<br>(-0.180)<br>[26]                   | 12.42<br>(2.519)<br>[26]                             | 1.7<br>(0.531)                                        | 326<br>(5.787)<br>[18]                                                     | 2.03<br>(0.708)<br>[36]                                                     |
| <i>Propithecus coquereli</i>                  | 2<br>(0.693)                       | 619<br>(6.428)                                                | 4.052<br>(1.399)<br>[26]                    | 30.19<br>(3.408)<br>[26]                             | --                                                    | 1012.3<br>(6.920)<br>[18]                                                  | --                                                                          |
| <i>Propithecus diadema</i>                    | 3<br>(1.099)                       | --                                                            | 5.76<br>(1.751)<br>[26]                     | 40.92<br>(3.711)<br>[26]                             | 2.7<br>(0.993)                                        | --                                                                         | 4.51<br>(1.506)<br>[1]                                                      |
| <i>Propithecus verreauxi</i>                  | 2<br>(0.693)<br>[12]               | --                                                            | 2.95<br>(1.082)<br>[26]                     | 26.21<br>(3.266)<br>[26]                             | 2.3<br>(0.751)                                        | 670<br>(6.507)<br>[18]                                                     | 4.57<br>(1.519)<br>[1]                                                      |
| <i>Varecia variegata</i>                      | 3<br>(1.099)                       | 471<br>(6.155)                                                | 3.52<br>(1.258)<br>[26]                     | 32.12<br>(3.469)<br>[26]                             | 2.2<br>(0.788)                                        | 603.6<br>(6.403)<br>[18]                                                   | 2.72<br>(1.001)<br>[1]                                                      |

| <i>genus &amp; species</i>                   | <i>RP, days<br/>(ln)<br/>[ref]</i> | <i>osteocyte<br/>density,<br/>per mm<sup>2</sup><br/>(ln)</i> | <i>body mass,<br/>kg<br/>(ln)<br/>[ref]</i> | <i>endocranial<br/>volume, cc<br/>(ln)<br/>[ref]</i> | <i>semicircular<br/>canal radius,<br/>mm<br/>(ln)</i> | <i>basal<br/>metabolic<br/>rate, mL O<sub>2</sub>/h<br/>(ln)<br/>[ref]</i> | <i>1<sup>st</sup> female<br/>reproduction,<br/>years<br/>(ln)<br/>[ref]</i> |
|----------------------------------------------|------------------------------------|---------------------------------------------------------------|---------------------------------------------|------------------------------------------------------|-------------------------------------------------------|----------------------------------------------------------------------------|-----------------------------------------------------------------------------|
| <b>anthropoids</b>                           |                                    |                                                               |                                             |                                                      |                                                       |                                                                            |                                                                             |
| <i>Afropithecus turkanensis</i> <sup>†</sup> | 8<br>(2.079)<br>[2]                | --                                                            | 34.5<br>(3.541)<br>[2]                      | --                                                   | --                                                    | --                                                                         |                                                                             |
| <i>Alouatta</i> sp.                          | 6<br>(1.792)<br>[2]                | --                                                            | 6.415<br>(1.859)<br>[26]                    | 54.3<br>(3.995)<br>[26]                              | 2.4<br>(0.875)                                        | 2055<br>(7.628)<br>[32]                                                    | 3.8<br>(1.335)<br>[7]                                                       |
| <i>Aotus</i> sp.                             | 3<br>(1.099)<br>[2]                | --                                                            | 0.91<br>(-0.094)<br>[26]                    | 17.74<br>(2.876)<br>[26]                             | 2<br>(0.693)                                          | 496<br>(6.207)<br>[23]                                                     | 2.42<br>(0.884)<br>[7]                                                      |
| <i>Callicebus personatus</i>                 | 3<br>(1.099)<br>[2]                | --                                                            | 1.305<br>(0.266)<br>[26]                    | 19.84<br>(2.988)<br>[26]                             | --                                                    | --                                                                         | --                                                                          |
| <i>Callimico goeldii</i>                     | 3<br>(1.099)<br>[2]                | --                                                            | 0.389<br>(-0.944)<br>[26]                   | 11.24<br>(2.419)<br>[26]                             | 1.6<br>(0.470)                                        | --                                                                         | 1.3<br>(0.262)<br>[7]                                                       |
| <i>Callithrix humeralifer</i>                | 3<br>(1.099)<br>[2]                | --                                                            | 0.35<br>(-1.040)<br>[2]                     | 8.2<br>(2.104)<br>[26]                               | --                                                    | --                                                                         | 1.6<br>(0.470)<br>[7]                                                       |
| <i>Callithrix jacchus</i>                    | 1<br>(0)<br>[2]                    | --                                                            | 0.257<br>(-1.359)<br>[26]                   | 7.21<br>(1.975)<br>[26]                              | 1.5<br>(0.405)                                        | 154<br>(5.037)<br>[23]                                                     | 1.67<br>(0.513)<br>[7]                                                      |
| <i>Cebuella pygmaea</i>                      | 1<br>(0)<br>[2]                    | --                                                            | 0.123<br>(-2.096)<br>[26]                   | 4.24<br>(1.444)<br>[26]                              | --                                                    | 89<br>(4.489)<br>[23]                                                      | 1.9<br>(0.642)<br>[7]                                                       |
| <i>Cebus albifrons</i><br>(M)                | 6<br>(1.792)<br>[2]                | --                                                            | 2.48<br>(0.908)<br>[26]                     | 64.11<br>(4.161)<br>[26]                             | --                                                    | --                                                                         | 4<br>(1.386)<br>[7]                                                         |

| <b>genus &amp; species</b>      | <b>RP, days<br/>(ln)<br/>[ref]</b> | <b>osteocyte<br/>density,<br/>per mm<sup>2</sup><br/>(ln)</b> | <b>body mass,<br/>kg<br/>(ln)<br/>[ref]</b> | <b>endocranial<br/>volume, cc<br/>(ln)<br/>[ref]</b> | <b>semicircular<br/>canal radius,<br/>mm<br/>(ln)</b> | <b>basal<br/>metabolic<br/>rate, mL O<sub>2</sub>/h<br/>(ln)<br/>[ref]</b> | <b>1<sup>st</sup> female<br/>reproduction,<br/>years<br/>(ln)<br/>[ref]</b> |
|---------------------------------|------------------------------------|---------------------------------------------------------------|---------------------------------------------|------------------------------------------------------|-------------------------------------------------------|----------------------------------------------------------------------------|-----------------------------------------------------------------------------|
| <i>Cebus albifrons</i> (F)      | 5<br>(1.609)<br>[2]                | --                                                            | 1.814<br>(0.596)<br>[26]                    | 63.24<br>(4.147)<br>[26]                             | --                                                    | --                                                                         | 4<br>(1.386)<br>[7]                                                         |
| <i>Cebus apella</i> (M)         | 5<br>(1.609)<br>[2]                | --                                                            | 3.38<br>(1.218)<br>[26]                     | 68.94<br>(4.233)<br>[26]                             | 2.2<br>(0.788)                                        | --                                                                         | 5.78<br>(1.754)<br>[7]                                                      |
| <i>Cebus apella</i> (F)         | 4<br>(1.386)<br>[2]                | --                                                            | 2.49<br>(0.912)<br>[26]                     | 64.3<br>(4.164)<br>[26]                              | 2.2<br>(0.788)                                        | --                                                                         | 5.78<br>(1.754)<br>[7]                                                      |
| <i>Cebus capucinus</i><br>(M)   | 6<br>(1.792)<br>[2]                | --                                                            | 3.267<br>(1.184)<br>[26]                    | 73.13<br>(4.292)<br>[26]                             | --                                                    | --                                                                         | 4<br>(1.386)<br>[7]                                                         |
| <i>Cebus capucinus</i><br>(F)   | 4<br>(1.386)<br>[2]                | --                                                            | 3.267<br>(1.184)<br>[26]                    | 72.12<br>(4.278)<br>[26]                             | --                                                    | --                                                                         | 4<br>(1.386)<br>[7]                                                         |
| <i>Cebus olivaceus</i>          | 4<br>(1.386)<br>[2]                | --                                                            | 2.974<br>(1.090)<br>[26]                    | 69.84<br>(4.246)<br>[26]                             | --                                                    | --                                                                         | 6<br>(1.792)<br>[7]                                                         |
| <i>Cercopithecus<br/>mona</i>   | 4<br>(1.386)                       | --                                                            | 3.313<br>(1.198)<br>[26]                    | 61.84<br>(4.125)<br>[26]                             | 2.3<br>(0.833)                                        | --                                                                         | 4<br>(1.386)<br>[34]                                                        |
| <i>Chlorocebus<br/>tantalus</i> | 3,4**<br>(1.253)                   | --                                                            | 4.082<br>(1.407)<br>[26]                    | 56.77<br>(4.039)<br>[26]                             | 2.3<br>(0.833)                                        | --                                                                         | 4<br>(1.386)<br>[37]                                                        |
| <i>Colobus<br/>polykomos</i>    | 4<br>(1.386)                       | --                                                            | 8.654<br>(2.158)<br>[26]                    | 73.38<br>(4.296)<br>[26]                             | 2.9<br>(1.065)                                        | --                                                                         | 8.5<br>(2.140)<br>[35]                                                      |

| <b>genus &amp; species</b>        | <b>RP, days<br/>(ln)<br/>[ref]</b> | <b>osteocyte<br/>density,<br/>per mm<sup>2</sup><br/>(ln)</b> | <b>body mass,<br/>kg<br/>(ln)<br/>[ref]</b> | <b>endocranial<br/>volume, cc<br/>(ln)<br/>[ref]</b> | <b>semicircular<br/>canal radius,<br/>mm<br/>(ln)</b> | <b>basal<br/>metabolic<br/>rate, mL O<sub>2</sub>/h<br/>(ln)<br/>[ref]</b> | <b>1<sup>st</sup> female<br/>reproduction,<br/>years<br/>(ln)<br/>[ref]</b> |
|-----------------------------------|------------------------------------|---------------------------------------------------------------|---------------------------------------------|------------------------------------------------------|-------------------------------------------------------|----------------------------------------------------------------------------|-----------------------------------------------------------------------------|
| <i>Dryopithecus laietanus</i> †   | 7<br>(1.946)<br>[2]                | --                                                            | 23<br>(3.135)<br>[2]                        | --                                                   | --                                                    | --                                                                         | --                                                                          |
| <i>Erythrocebus patas</i>         | 4<br>(1.386)<br>[2]                | --                                                            | 4.8<br>(1.569)<br>[26]                      | 93.88<br>(4.542)<br>[26]                             | 2.5<br>(0.916)                                        | 1068<br>(6.974)<br>[32]                                                    | 3<br>(1.099)<br>[35]                                                        |
| <i>Gigantopithecus blacki</i> †   | 11<br>(2.398)<br>[2]               | --                                                            | 300<br>(5.704)<br>[2]                       | --                                                   | --                                                    | --                                                                         | --                                                                          |
| <i>Gorilla gorilla</i> (M)        | 10*<br>(2.303)<br>[2]              | --                                                            | 169.3<br>(5.132)<br>[26]                    | 524.92<br>(6.263)<br>[26]                            | 3<br>(1.099)                                          | --                                                                         | 10.3<br>(2.332)<br>[1]                                                      |
| <i>Gorilla gorilla</i> (F)        | 9*<br>(2.197)<br>[2]               | --                                                            | 75.7<br>(4.327)<br>[26]                     | 455.89<br>(6.122)<br>[26]                            | 3<br>(1.099)                                          | --                                                                         | 10.3<br>(2.332)<br>[1]                                                      |
| <i>Graecopithecus freybergi</i> † | 8<br>(2.079)<br>[2]                | --                                                            | 63<br>(4.143)<br>[2]                        | --                                                   | --                                                    | --                                                                         | --                                                                          |
| <i>Homo sapiens</i> (M)           | 8*<br>(2.079)<br>[2]               | --                                                            | 60.2<br>(4.098)<br>[26]                     | 1409<br>(7.251)<br>[26]                              | 2.9<br>(1.065)                                        | 12500<br>(9.433)<br>[23]                                                   | 19.3<br>(2.961)<br>[35]                                                     |
| <i>Homo sapiens</i> (F)           | 8*<br>(2.079)<br>[2]               | --                                                            | 53.6<br>(3.982)<br>[26]                     | 1409<br>(7.251)<br>[26]                              | 2.9<br>(1.065)                                        | 12500<br>(9.433)<br>[23]                                                   | 19.3<br>(2.961)<br>[35]                                                     |
| <i>Hylobates lar</i>              | 4<br>(1.386)<br>[2]                | --                                                            | 5.6<br>(1.723)<br>[26]                      | 102.11<br>(4.626)<br>[26]                            | 2.6<br>(0.956)                                        | --                                                                         | 9.8<br>(2.282)<br>[33]                                                      |

| <b>genus &amp; species</b>           | <b>RP, days<br/>(ln)<br/>[ref]</b> | <b>osteocyte<br/>density,<br/>per mm<sup>2</sup><br/>(ln)</b> | <b>body mass,<br/>kg<br/>(ln)<br/>[ref]</b> | <b>endocranial<br/>volume, cc<br/>(ln)<br/>[ref]</b> | <b>semicircular<br/>canal radius,<br/>mm<br/>(ln)</b> | <b>basal<br/>metabolic<br/>rate, mL O<sub>2</sub>/h<br/>(ln)<br/>[ref]</b> | <b>1<sup>st</sup> female<br/>reproduction,<br/>years<br/>(ln)<br/>[ref]</b> |
|--------------------------------------|------------------------------------|---------------------------------------------------------------|---------------------------------------------|------------------------------------------------------|-------------------------------------------------------|----------------------------------------------------------------------------|-----------------------------------------------------------------------------|
| <i>Hylobates<br/>syndactylus</i>     | 4,5**<br>(1.504)<br>[2]            | --                                                            | 10.7<br>(2.370)<br>[26]                     | 123.83<br>(4.819)<br>[26]                            | 2.8<br>(1.030)                                        | --                                                                         | 9<br>(2.197)<br>[33]                                                        |
| <i>Lagothrix poeppigii</i>           | 5,6**<br>(1.705)                   | --                                                            | 9.072<br>(2.205)<br>[26]                    | 99.23<br>(4.597)<br>[26]                             | 2.5<br>(0.916)                                        | --                                                                         | 5<br>(1.609)<br>[36]                                                        |
| <i>Leontopithecus<br/>rosalia</i>    | 3<br>(1.099)<br>[2]                | --                                                            | 0.628<br>(-0.465)<br>[26]                   | 12.65<br>(2.538)<br>[26]                             | 1.5<br>(0.405)                                        | 382<br>(5.945)<br>[23]                                                     | 2.4<br>(0.875)<br>[7]                                                       |
| <i>Macaca<br/>nemestrina</i>         | 4<br>(1.386)<br>[2]                | --                                                            | 7.8<br>(2.054)<br>[26]                      | 106.04<br>(4.664)<br>[26]                            | 2.5<br>(0.916)                                        | --                                                                         | 3.9<br>(1.361)<br>[1]                                                       |
| <i>Pan troglodytes</i>               | 6<br>(1.792)<br>[2]                | --                                                            | 35.8<br>(3.578)<br>[26]                     | 377.57<br>(5.934)<br>[26]                            | 2.7<br>(0.993)                                        | 9070<br>(9.113)<br>[23]                                                    | 13.9<br>(2.632)<br>[1]                                                      |
| <i>Papio hamadryas<br/>hamadryas</i> | 7<br>(1.946)<br>[2]                | --                                                            | 9.4<br>(2.241)<br>[26]                      | 149.93<br>(5.010)<br>[26]                            | 2.7<br>(0.993)                                        | --                                                                         | 6.1<br>(1.808)<br>[36]                                                      |
| <i>Papio hamadryas<br/>anubis</i>    | 7<br>(1.946)<br>[2]                | --                                                            | 21<br>(3.044)<br>[26]                       | 168.64<br>(5.128)<br>[26]                            | 2.7<br>(0.993)                                        | 2778<br>(7.929)<br>[32]                                                    | 4.5<br>(1.504)<br>[1]                                                       |
| <i>Pongo pygmaeus<br/>(M)</i>        | 10*<br>(2.303)<br>[2]              | --                                                            | 78.3<br>(4.361)<br>[26]                     | 427.51<br>(6.058)<br>[26]                            | 2.6<br>(0.956)                                        | 4860<br>(8.489)<br>[21]                                                    | 14.32<br>(2.662)<br>[1]                                                     |
| <i>Pongo pygmaeus<br/>(F)</i>        | 10*<br>(2.303)<br>[2]              | --                                                            | 35.8<br>(3.578)<br>[26]                     | 338.51<br>(5.825)<br>[26]                            | 2.6<br>(0.956)                                        | 4860<br>(8.489)<br>[21]                                                    | 14.32<br>(2.662)<br>[1]                                                     |

| <b>genus &amp; species</b>             | <b>RP, days<br/>(ln)<br/>[ref]</b> | <b>osteocyte<br/>density,<br/>per mm<sup>2</sup><br/>(ln)</b> | <b>body mass,<br/>kg<br/>(ln)<br/>[ref]</b> | <b>endocranial<br/>volume, cc<br/>(ln)<br/>[ref]</b> | <b>semicircular<br/>canal radius,<br/>mm<br/>(ln)</b> | <b>basal<br/>metabolic<br/>rate, mL O<sub>2</sub>/h<br/>(ln)<br/>[ref]</b> | <b>1<sup>st</sup> female<br/>reproduction,<br/>years<br/>(ln)<br/>[ref]</b> |
|----------------------------------------|------------------------------------|---------------------------------------------------------------|---------------------------------------------|------------------------------------------------------|-------------------------------------------------------|----------------------------------------------------------------------------|-----------------------------------------------------------------------------|
| <i>Proconsul heseloni</i> <sup>†</sup> | 5<br>(1.609)<br>[2]                | --                                                            | 10.5<br>(2.351)<br>[2]                      | 167<br>(5.118)<br>[31]                               | --                                                    | --                                                                         | --                                                                          |
| <i>Proconsul nyanzae</i> <sup>†</sup>  | 6<br>(1.792)<br>[2]                | --                                                            | 35<br>(3.555)<br>[2]                        | --                                                   | --                                                    | --                                                                         | --                                                                          |
| <i>Saguinus fuscicollis</i>            | 2<br>(0.693)<br>[2]                | --                                                            | 0.373<br>(-0.986)<br>[26]                   | 7.92<br>(2.069)<br>[26]                              | --                                                    | --                                                                         | 2.33<br>(0.846)<br>[7]                                                      |
| <i>Saguinus nigricollis</i>            | 2<br>(0.693)<br>[2]                | --                                                            | 0.45<br>(-0.734)<br>[25]                    | 8.9<br>(2.186)<br>[25]                               | --                                                    | --                                                                         | 2.33<br>(0.846)<br>[7]                                                      |
| <i>Saguinus oedipus</i>                | 1<br>(0)<br>[2]                    | --                                                            | 0.43<br>(-0.844)<br>[26]                    | 9.71<br>(2.273)<br>[26]                              | 1.5<br>(0.405)                                        | --                                                                         | 1.89<br>(0.637)<br>[7]                                                      |
| <i>Saimiri boliviensis</i>             | 3<br>(1.099)<br>[2]                | --                                                            | 0.7<br>(-0.357)<br>[2]                      | 25.64<br>(3.244)<br>[26]                             | --                                                    | --                                                                         | --                                                                          |
| <i>Saimiri oerstedii</i>               | 3<br>(1.099)<br>[2]                | --                                                            | 0.829<br>(-0.188)<br>[26]                   | 24.97<br>(3.218)<br>[26]                             | --                                                    | --                                                                         | --                                                                          |
| <i>Saimiri sciureus</i>                | 3<br>(1.099)<br>[2]                | --                                                            | 0.852<br>(-0.16)<br>[26]                    | 23.62<br>(3.162)<br>[26]                             | 1.9<br>(0.642)                                        | 592<br>(6.383)<br>[23]                                                     | 2.5<br>(0.916)<br>[7]                                                       |
| <i>Semnopithecus entellus priam</i>    | 5<br>(1.609)<br>[2]                | --                                                            | 9.9<br>(2.293)<br>[26]                      | 110.93<br>(4.709)<br>[26]                            | 2.5<br>(0.916)                                        | --                                                                         | 4.5<br>(1.504)<br>[33]                                                      |



| <i>genus &amp; species</i>          | <i>RP, days<br/>(ln)<br/>[ref]</i> | <i>osteocyte<br/>density,<br/>per mm<sup>2</sup><br/>(ln)</i> | <i>body mass,<br/>kg<br/>(ln)<br/>[ref]</i> | <i>endocranial<br/>volume, cc<br/>(ln)<br/>[ref]</i> | <i>semicircular<br/>canal radius,<br/>mm<br/>(ln)</i> | <i>basal<br/>metabolic<br/>rate, mL O<sub>2</sub>/h<br/>(ln)<br/>[ref]</i> | <i>1<sup>st</sup> female<br/>reproduction,<br/>years<br/>(ln)<br/>[ref]</i> |
|-------------------------------------|------------------------------------|---------------------------------------------------------------|---------------------------------------------|------------------------------------------------------|-------------------------------------------------------|----------------------------------------------------------------------------|-----------------------------------------------------------------------------|
| <i>Theropithecus<br/>gelada</i> (M) | 7<br>(1.946)<br>[2]                | --                                                            | 20.5<br>(3.020)<br>[26]                     | 142.13<br>(4.957)<br>[26]                            | 2.5<br>(0.916)                                        | --                                                                         | 4<br>(1.386)<br>[36]                                                        |
| <i>Theropithecus<br/>gelada</i> (F) | 7<br>(1.946)<br>[2]                | --                                                            | 13.6<br>(2.610)<br>[26]                     | 124.52<br>(4.824)<br>[26]                            | 2.5<br>(0.916)                                        | --                                                                         | 4<br>(1.386)<br>[36]                                                        |
| <i>Theropithecus<br/>oswaldi</i> †  | 6<br>(1.792)<br>[28]               | --                                                            | 25<br>(3.219)<br>[20]                       | --                                                   | --                                                    | --                                                                         | --                                                                          |
| <i>Trachypithecus<br/>cristatus</i> | 4<br>(1.386)                       | --                                                            | 6.3<br>(1.841)<br>[26]                      | 57.86<br>(4.058)<br>[26]                             | --                                                    | --                                                                         | 4<br>(1.386)<br>[1]                                                         |
