# Supplementary material for: Lemur Biorhythms and Life History Evolution
Source: PubMed Central journal article supplement (PMC4534448; doi:10.1371/journal.pone.0134210), 2015-08-12
Supplement: pone.0134210.s004.pdf [file pone.0134210.s004.pdf]

**Table S3. Correlations & regression statistics, raw values (without phylogenetic correction).** **A.** Regression statistics (least squares) for ln RP & ln OD relationships. Significant relationships highlighted in bold. **B.** Bivariate correlations matrices for all variables. Significant correlations for RP & OD highlighted in bold. \* = no data available for subfossil lemurs, so no separate analysis excluding subfossil species conducted; \*\* = sample too small for analysis.

| <b>A.</b>                    | <i>sample</i>               | $r^2$        | $p$             | $n$       | $B$          | <i>standard error</i> | $Beta$       | <i>95% confidence interval</i> |                    |
|------------------------------|-----------------------------|--------------|-----------------|-----------|--------------|-----------------------|--------------|--------------------------------|--------------------|
|                              |                             |              |                 |           |              |                       |              | <i>lower bound</i>             | <i>upper bound</i> |
| <i>In Body Mass vs In RP</i> | <i>primates</i>             | <b>0.552</b> | <b>&lt;0.01</b> | <b>70</b> | <b>0.234</b> | <b>0.260</b>          | <b>0.743</b> | <b>0.183</b>                   | <b>0.284</b>       |
|                              | <i>anthropoids</i>          | <b>0.806</b> | <b>&lt;0.01</b> | <b>48</b> | <b>0.275</b> | <b>0.020</b>          | <b>0.898</b> | <b>0.235</b>                   | <b>0.315</b>       |
|                              | <i>strepsirrhines</i>       | 0.053        | 0.30            | 22        | 0.036        | 0.034                 | 0.230        | -0.035                         | 0.107              |
|                              | <i>lemurs</i>               | 0.298        | 0.26            | 16        | 0.058        | 0.50                  | 0.298        | -0.049                         | 0.165              |
|                              | <i>streps. no subfossil</i> | 0.007        | 0.75            | 16        | 0.018        | 0.057                 | 0.085        | -0.105                         | 0.141              |
|                              | <i>non-lemur streps.</i>    | 0.059        | 0.64            | 6         | 0.036        | 0.072                 | 0.244        | -0.163                         | 0.236              |
| <i>In ECV vs In RP</i>       | <i>primates</i>             | <b>0.706</b> | <b>&lt;0.01</b> | <b>64</b> | <b>0.347</b> | <b>0.028</b>          | <b>0.840</b> | <b>0.290</b>                   | <b>0.404</b>       |
|                              | <i>anthropoids</i>          | <b>0.776</b> | <b>&lt;0.01</b> | <b>43</b> | <b>0.360</b> | <b>0.030</b>          | <b>0.881</b> | <b>0.299</b>                   | <b>0.420</b>       |
|                              | <i>strepsirrhines</i>       | 0.162        | 0.07            | 21        | 0.114        | 0.059                 | 0.403        | -0.010                         | 0.239              |
|                              | <i>lemurs</i>               | <b>0.301</b> | <b>0.03</b>     | <b>16</b> | <b>0.202</b> | <b>0.082</b>          | <b>0.549</b> | <b>0.026</b>                   | <b>0.378</b>       |
|                              | <i>streps. no subfossil</i> | 0.066        | 0.36            | 16        | 0.087        | 0.091                 | 0.256        | -0.109                         | 0.283              |
|                              | <i>non-lemur streps.</i>    | 0.003        | 0.93            | 6         | 0.019        | 0.207                 | 0.052        | -0.640                         | 0.677              |
| <i>In SCR vs In RP</i>       | <i>primates</i>             | <b>0.456</b> | <b>&lt;0.01</b> | <b>47</b> | <b>1.721</b> | <b>0.281</b>          | <b>0.675</b> | <b>1.156</b>                   | <b>2.286</b>       |
|                              | <i>anthropoids</i>          | <b>0.686</b> | <b>&lt;0.01</b> | <b>28</b> | <b>2.280</b> | <b>0.303</b>          | <b>0.828</b> | <b>1.658</b>                   | <b>2.902</b>       |
|                              | <i>strepsirrhines</i>       | 0.120        | 0.15            | 19        | 0.383        | 0.252                 | 0.346        | -0.149                         | 0.914              |
|                              | <i>lemurs</i>               | <b>0.328</b> | <b>0.03</b>     | <b>15</b> | <b>1.118</b> | <b>0.443</b>          | <b>0.573</b> | <b>0.161</b>                   | <b>2.074</b>       |
|                              | <i>streps. no subfossil</i> | 0.005        | 0.82            | 14        | 0.061        | 0.269                 | 0.068        | -0.531                         | 0.653              |
|                              | <i>non-lemur streps.</i>    | 0.131        | 0.639           | 5         | -0.278       | 0.508                 | -0.361       | -2.464                         | 1.907              |

|                                     |                                   |                        |                 |           |              |              |              |              |              |
|-------------------------------------|-----------------------------------|------------------------|-----------------|-----------|--------------|--------------|--------------|--------------|--------------|
| <b><i>In AFR vs In RP</i></b>       | <b><i>primates</i></b>            | <b>0.507</b>           | <b>&lt;0.01</b> | <b>51</b> | <b>0.471</b> | <b>0.085</b> | <b>0.712</b> | <b>0.431</b> | <b>0.741</b> |
|                                     | <b><i>anthropoids</i></b>         | <b>0.563</b>           | <b>&lt;0.01</b> | <b>39</b> | <b>0.631</b> | <b>0.091</b> | <b>0.750</b> | <b>0.446</b> | <b>0.817</b> |
|                                     | <b><i>strepsirrhines*</i></b>     | 0.099                  | 0.319           | 12        | -0.144       | 0.37         | -0.315       | -0.450       | 0.162        |
|                                     | <b><i>lemurs</i></b>              | 0.072                  | 0.486           | 9         | -0.158       | 0.215        | -0.268       | -0.666       | 0.350        |
|                                     | <b><i>non-lemur streps.**</i></b> | -                      | -               | -         | -            | -            | -            | -            | -            |
| <b><i>In Body mass vs In OD</i></b> | <b><i>primates</i></b>            | -                      | -               | -         | -            | -            | -            | -            | -            |
|                                     | <b><i>anthropoids</i></b>         | -                      | -               | -         | -            | -            | -            | -            | -            |
|                                     | <b><i>strepsirrhines</i></b>      | 0.068                  | 0.47            | 10        | -0.059       | 0.077        | -0.260       | -0.236       | 0.119        |
|                                     | <b><i>lemurs</i></b>              | 0.566                  | 0.08            | 6         | -0.240       | 0.105        | -0.752       | -0.531       | 0.052        |
|                                     | <b><i>In ECV vs In OD</i></b>     | <b><i>primates</i></b> | -               | -         | -            | -            | -            | -            | -            |
| <b><i>anthropoids</i></b>           |                                   | -                      | -               | -         | -            | -            | -            | -            | -            |
| <b><i>strepsirrhines</i></b>        |                                   | 0.128                  | 0.31            | 10        | -0.107       | 0.099        | -0.358       | -0.335       | 0.121        |
| <b><i>lemurs</i></b>                |                                   | 0.315                  | 0.25            | 6         | -0.207       | 0.153        | -0.561       | -0.631       | 0.217        |
| <b><i>In SCR vs In OD</i></b>       |                                   | <b><i>primates</i></b> | -               | -         | -            | -            | -            | -            | -            |
|                                     | <b><i>anthropoids</i></b>         | -                      | -               | -         | -            | -            | -            | -            | -            |
|                                     | <b><i>strepsirrhines</i></b>      | 0.003                  | 0.89            | 9         | 0.059        | 0.422        | 0.053        | -0.938       | 1.057        |
|                                     | <b><i>lemurs</i></b>              | 0.233                  | 0.41            | 5         | -1.233       | 1.291        | -0.483       | -5.342       | 2.877        |
|                                     | <b><i>In AFR vs In OD</i></b>     | <b><i>primates</i></b> | -               | -         | -            | -            | -            | -            | -            |
| <b><i>anthropoids</i></b>           |                                   | -                      | -               | -         | -            | -            | -            | -            | -            |
| <b><i>strepsirrhines</i></b>        |                                   | 0.185                  | 0.288           | 8         | -0.228       | 0.195        | -0.430       | -0.706       | 0.250        |
| <b><i>lemurs</i></b>                |                                   | 0.108                  | 0.590           | 5         | -0.623       | 1.035        | 0.328        | -3.918       | 2.671        |

| <b>B.</b>                  |                | <i>ln RP</i>     | <i>ln body mass</i> | <i>ln ECV</i>    | <i>ln SCR</i>    | <i>ln OD</i> | <i>ln AFR</i>    |
|----------------------------|----------------|------------------|---------------------|------------------|------------------|--------------|------------------|
| <b>primates</b>            |                |                  |                     |                  |                  |              |                  |
| <b><i>ln RP</i></b>        | r              | 1                | <b>0.743</b>        | <b>0.840</b>     | <b>0.675</b>     | -            | <b>0.712</b>     |
|                            | r <sup>2</sup> | 1                | <b>0.552</b>        | <b>0.706</b>     | <b>0.456</b>     | -            | <b>0.508</b>     |
|                            | p              | -                | <b>&lt; 0.01</b>    | <b>&lt; 0.01</b> | <b>&lt; 0.01</b> | -            | <b>&lt; 0.01</b> |
|                            | n              | 74               | <b>70</b>           | <b>64</b>        | <b>47</b>        | -            | <b>51</b>        |
| <b><i>ln body mass</i></b> | r              | <b>0.743</b>     | 1                   | 0.916            | 0.837            | -            | 0.881            |
|                            | r <sup>2</sup> | <b>0.552</b>     | 1                   | 0.839            | 0.701            | -            | 0.776            |
|                            | p              | <b>&lt; 0.01</b> | -                   | <b>&lt; 0.01</b> | <b>&lt; 0.01</b> | -            | <b>&lt; 0.01</b> |
|                            | n              | <b>70</b>        | 74                  | 67               | 50               | -            | 54               |
| <b><i>ln ECV</i></b>       | r              | <b>0.840</b>     | 0.916               | 1                | 0.836            | -            | 0.909            |
|                            | r <sup>2</sup> | <b>0.706</b>     | 0.839               | 1                | 0.699            | -            | 0.826            |
|                            | p              | <b>&lt; 0.01</b> | <b>&lt; 0.01</b>    | -                | <b>&lt; 0.01</b> | -            | <b>&lt; 0.01</b> |
|                            | n              | <b>64</b>        | 67                  | 67               | 49               | -            | 53               |
| <b><i>ln SCR</i></b>       | r              | <b>0.675</b>     | 0.837               | 0.836            | 1                | -            | 0.831            |
|                            | r <sup>2</sup> | <b>0.456</b>     | 0.701               | 0.699            | 1                | -            | 0.691            |
|                            | p              | <b>&lt; 0.01</b> | <b>&lt; 0.01</b>    | <b>&lt; 0.01</b> | -                | -            | <b>&lt; 0.01</b> |
|                            | n              | <b>47</b>        | 50                  | 49               | 57               | -            | 50               |
| <b><i>ln AFR</i></b>       | r              | <b>0.712</b>     | 0.881               | 0.909            | 0.800            | -            | 1                |
|                            | r <sup>2</sup> | <b>0.508</b>     | 0.776               | 0.826            | 0.640            | -            | 1                |
|                            | p              | <b>&lt; 0.01</b> | <b>&lt; 0.01</b>    | <b>&lt; 0.01</b> | <b>&lt; 0.01</b> | -            | -                |
|                            | n              | <b>51</b>        | 54                  | 53               | 50               | -            | 61               |
| <b>anthropoids</b>         |                |                  |                     |                  |                  |              |                  |
| <b><i>ln RP</i></b>        | r              | 1                | <b>0.898</b>        | <b>0.881</b>     | <b>0.828</b>     | -            | <b>0.764</b>     |
|                            | r <sup>2</sup> | 1                | <b>0.806</b>        | <b>0.776</b>     | <b>0.686</b>     | -            | <b>0.584</b>     |
|                            | p              | -                | <b>&lt; 0.01</b>    | <b>&lt; 0.01</b> | <b>&lt; 0.01</b> | -            | <b>&lt; 0.01</b> |
|                            | n              | 52               | <b>48</b>           | <b>43</b>        | <b>28</b>        | -            | <b>38</b>        |
| <b><i>ln body mass</i></b> | r              | <b>0.898</b>     | 1                   | 0.961            | 0.904            | -            | 0.882            |
|                            | r <sup>2</sup> | <b>0.806</b>     | 1                   | 0.924            | 0.817            | -            | 0.778            |
|                            | p              | <b>&lt; 0.01</b> | -                   | <b>&lt; 0.01</b> | <b>&lt; 0.01</b> | -            | <b>&lt; 0.01</b> |
|                            | n              | <b>48</b>        | 51                  | 45               | 30               | -            | 40               |

|                              |                |                  |        |        |        |        |        |
|------------------------------|----------------|------------------|--------|--------|--------|--------|--------|
| <b><i>In ECV</i></b>         | r              | <b>0.881</b>     | 0.961  | 1      | 0.886  | -      | 0.922  |
|                              | r <sup>2</sup> | <b>0.776</b>     | 0.924  | 1      | 0.785  | -      | 0.850  |
|                              | p              | <b>&lt; 0.01</b> | < 0.01 | -      | < 0.01 | -      | < 0.01 |
|                              | n              | <b>43</b>        | 45     | 45     | 29     | -      | 39     |
| <b><i>In SCR</i></b>         | r              | <b>0.828</b>     | 0.904  | 0.886  | 1      | -      | 0.796  |
|                              | r <sup>2</sup> | <b>0.686</b>     | 0.817  | 0.785  | 1      | -      | 0.634  |
|                              | p              | <b>&lt; 0.01</b> | < 0.01 | < 0.01 | -      | -      | < 0.01 |
|                              | n              | <b>28</b>        | 30     | 29     | 31     | -      | 30     |
| <b><i>In AFR</i></b>         | r              | <b>0.747</b>     | 0.869  | 0.911  | 0.804  | -      | 1      |
|                              | r <sup>2</sup> | <b>0.558</b>     | 0.755  | 0.829  | 0.646  | -      | 1      |
|                              | p              | <b>&lt; 0.01</b> | < 0.01 | < 0.01 | < 0.01 | -      | -      |
|                              | n              | <b>38</b>        | 39     | 38     | 30     | -      | 40     |
| <b><i>strepsirrhines</i></b> |                |                  |        |        |        |        |        |
| <b><i>In RP</i></b>          | r              | 1                | 0.230  | 0.403  | 0.346  | -0.475 | -0.315 |
|                              | r <sup>2</sup> | 1                | 0.053  | 0.162  | 0.120  | 0.226  | 0.099  |
|                              | p              | -                | 0.303  | 0.070  | 0.147  | 0.197  | 0.319  |
|                              | n              | 22               | 22     | 21     | 19     | 9      | 12     |
| <b><i>In body mass</i></b>   | r              | 0.230            | 1      | 0.959  | 0.732  | -0.260 | 0.875  |
|                              | r <sup>2</sup> | 0.053            | 1      | 0.920  | 0.536  | 0.068  | 0.766  |
|                              | p              | 0.303            | -      | < 0.01 | < 0.01 | 0.468  | < 0.01 |
|                              | n              | 22               | 23     | 22     | 20     | 10     | 13     |
| <b><i>In ECV</i></b>         | r              | 0.403            | 0.959  | 1      | 0.791  | -0.358 | 0.850  |
|                              | r <sup>2</sup> | 0.162            | 0.920  | 1      | 0.626  | 0.128  | 0.723  |
|                              | p              | 0.070            | < 0.01 | -      | < 0.01 | 0.310  | < 0.01 |
|                              | n              | 21               | 22     | 22     | 20     | 10     | 13     |
| <b><i>In SCR</i></b>         | r              | 0.346            | 0.732  | 0.791  | 1      | -0.053 | 0.836  |
|                              | r <sup>2</sup> | 0.120            | 0.536  | 0.626  | 1      | 0.003  | 0.699  |
|                              | p              | 0.147            | < 0.01 | < 0.01 | -      | 0.892  | < 0.01 |
|                              | n              | 19               | 20     | 20     | 26     | 9      | 19     |
| <b><i>In OD</i></b>          | r              | -0.475           | -0.260 | -0.358 | 0.053  | 1      | -0.430 |
|                              | r <sup>2</sup> | 0.226            | 0.068  | 0.128  | 0.003  | 1      | 0.185  |
|                              | p              | 0.197            | 0.468  | 0.310  | 0.892  | -      | 0.288  |
|                              | n              | 9                | 10     | 10     | 9      | 10     | 19     |

|                     |                |              |        |              |              |        |        |
|---------------------|----------------|--------------|--------|--------------|--------------|--------|--------|
| <i>In AFR</i>       | r              | -0.315       | 0.875  | 0.850        | 0.836        | -0.430 | 1      |
|                     | r <sup>2</sup> | 0.099        | 0.766  | 0.723        | 0.699        | 0.185  | 1      |
|                     | p              | 0.319        | < 0.01 | < 0.01       | < 0.01       | 0.288  | -      |
|                     | n              | 12           | 13     | 13           | 19           | 19     | 19     |
| <b>lemurs</b>       |                |              |        |              |              |        |        |
| <i>In RP</i>        | r              | 1            | 0.298  | <b>0.549</b> | <b>0.573</b> | -0.521 | -0.268 |
|                     | r <sup>2</sup> | 1            | 0.089  | <b>0.301</b> | <b>0.328</b> | 0.271  | 0.072  |
|                     | p              | -            | 0.263  | <b>0.028</b> | <b>0.025</b> | 0.289  | 0.486  |
|                     | n              | 16           | 16     | <b>16</b>    | <b>15</b>    | 6      | 9      |
| <i>In body mass</i> | r              | 0.298        | 1      | 0.921        | 0.369        | -0.752 | 0.730  |
|                     | r <sup>2</sup> | 0.089        | 1      | 0.848        | 0.136        | 0.566  | 0.533  |
|                     | p              | 0.263        | -      | < 0.01       | 0.176        | .084   | .025   |
|                     | n              | 16           | 16     | 16           | 15           | 6      | 9      |
| <i>In ECV</i>       | r              | <b>0.549</b> | 0.921  | 1            | 0.536        | -0.561 | 0.517  |
|                     | r <sup>2</sup> | <b>0.301</b> | 0.848  | 1            | 0.287        | 0.315  | 0.267  |
|                     | p              | <b>0.028</b> | < 0.01 | -            | 0.040        | 0.247  | 0.154  |
|                     | n              | <b>16</b>    | 16     | 16           | 15           | 6      | 9      |
| <i>In SCR</i>       | r              | <b>0.573</b> | 0.369  | 0.536        | 1            | -0.483 | 0.837  |
|                     | r <sup>2</sup> | <b>0.328</b> | 0.136  | 0.287        | 1            | 0.233  | 0.701  |
|                     | p              | <b>0.025</b> | 0.176  | 0.040        | -            | 0.410  | <0.01  |
|                     | n              | <b>15</b>    | 15     | 15           | 19           | 5      | 13     |
| <i>In OD</i>        | r              | -0.521       | -0.752 | -0.561       | -0.483       | 1      | -.328  |
|                     | r <sup>2</sup> | 0.271        | 0.566  | 0.315        | 0.233        | 1      | 0.108  |
|                     | p              | 0.289        | .084   | 0.247        | 0.410        | -      | 0.590  |
|                     | n              | 6            | 6      | 6            | 5            | 6      | 5      |
| <i>In AFR</i>       | r              | -0.268       | 0.730  | 0.517        | 0.837        | -.328  | 1      |
|                     | r <sup>2</sup> | 0.072        | 0.533  | 0.267        | 0.701        | 0.108  | 1      |
|                     | p              | 0.486        | .025   | 0.154        | <0.01        | 0.590  | -      |
|                     | n              | 9            | 9      | 9            | 13           | 5      | 13     |
